# Supplementary material for: Dietary Habits and Gut Microbiota in Healthy Adults: Focusing on the Right Diet. A Systematic Review
Source: MDPI journal article supplement (doi:10.3390/ijms22136728), 2021-06-23
Supplement: s1 [file s1]

**Supplementary Table S2 Cochrane Collaboration tool** for assessing risk of bias in randomized controlled trials included in the study.

| Study                   | Random sequence generation<br>( <i>selection bias</i> ) | Allocation concealment<br>( <i>selection bias</i> ) | Blinding of participants and personnel<br>( <i>performance bias</i> ) | Blinding of outcome assessment<br>( <i>detection bias</i> )<br>(patient-reported outcomes) | Incomplete outcome data addressed<br>( <i>attrition bias</i> )<br>(short-term outcomes 2-6 wks) | Incomplete outcome<br>( <i>attrition bias</i> )<br>(Longer-term outcomes > 6 wks) | Selective reporting<br>( <i>reporting bias</i> ) | Other potential threats to validity |
|-------------------------|---------------------------------------------------------|-----------------------------------------------------|-----------------------------------------------------------------------|--------------------------------------------------------------------------------------------|-------------------------------------------------------------------------------------------------|-----------------------------------------------------------------------------------|--------------------------------------------------|-------------------------------------|
| Pagliai G, 2019 [29,30] | High                                                    | Low                                                 | Low                                                                   | Low                                                                                        | Not applicable                                                                                  | Low                                                                               | Low                                              | Low                                 |
| Wan Y, 2019 [33,34]     | Low                                                     | Low                                                 | Low                                                                   | Low                                                                                        | Not applicable                                                                                  | Low                                                                               | Low                                              | Low                                 |
| Ghosh TS, 2020 [35,36]  | Low                                                     | Low                                                 | Low                                                                   | Low                                                                                        | Not applicable                                                                                  | Low                                                                               | Low                                              | Low                                 |
