# Supplementary material for: Dietary Habits and Gut Microbiota in Healthy Adults: Focusing on the Right Diet. A Systematic Review
Source: MDPI journal article supplement (doi:10.3390/ijms22136728), 2021-06-23
Supplement: s1 [file s1]

**Supplementary Table S3. Newcastle–Ottawa scale adapted for cross-sectional studies.**

|                                | Selection                    |             |                 |                                             | Comparability                                                                              | Outcome               |                  | Total |
|--------------------------------|------------------------------|-------------|-----------------|---------------------------------------------|--------------------------------------------------------------------------------------------|-----------------------|------------------|-------|
| Study                          | Representativeness of sample | Sample size | Non-respondents | Ascertainment of the exposure (risk factor) | Comparability of subjects in different outcome group based on the study design or analysis | Assessment of outcome | Statistical test |       |
| Ferrocino, I [19]              | •                            | •           | -               | •                                           | -                                                                                          | ••                    | •                | 6/10  |
| De Filippis F, 2016 [20]       | •                            | •           | -               | •                                           | -                                                                                          | ••                    | •                | 6/10  |
| Wu GD, 2016 [21]               | -                            | -           | -               | ••                                          | -                                                                                          | ••                    | •                | 5/10  |
| Gutiérrez-Díaz I, 2016 [22]    | -                            | -           | -               | ••                                          | -                                                                                          | ••                    | •                | 5/10  |
| Gutiérrez-Díaz I, 2017 [23]    | •                            | •           | -               | ••                                          | -                                                                                          | ••                    | •                | 7/10  |
| Federici E, 2017 [24]          | -                            | -           | -               | •                                           | -                                                                                          | ••                    | •                | 4/10  |
| Franco-de-Moraes AC, 2017 [25] | •                            | •           | -               | •                                           | -                                                                                          | ••                    | •                | 6/10  |
| Mitsou E.K, 2017 [26]          | •                            | •           | -               | ••                                          | -                                                                                          | ••                    | •                | 7/10  |
| Losasso C, 2018 [27]           | •                            | •           | -               | ••                                          | -                                                                                          | ••                    | •                | 7/10  |
| Trefflich I, 2019 [18]         | •                            | •           | -               | •                                           | -                                                                                          | ••                    | •                | 6/10  |
| Wang F, 2019 [31]              | -                            | -           | -               | ••                                          | -                                                                                          | ••                    | •                | 5/10  |
| Stefani, S 2018 [28]           | -                            | •           | -               | •                                           | -                                                                                          | ••                    | •                | 4/10  |
| Luisi MLE, 2019 [32]           | -                            | -           | -               | •                                           | -                                                                                          | ••                    | •                | 4/10  |
